# Supplementary material for: LIM and SH3 protein 1 localizes to the leading edge of protruding lamellipodia and regulates axon development
Source: PubMed Central journal article supplement — Mol Biol Cell. 2020 Nov 15;31(24):2718–32. doi: 10.1091/mbc.E20-06-0366 (PMC7927181; doi:10.1091/mbc.e20-06-0366), 2020-11-15
Supplement: mbc-31-2718-s001.pdf [file mbc-31-2718-s001.pdf]

# Supplemental Materials

*Molecular Biology of the Cell*

Pollitt *et al.*

**Supplemental Table 1.** Figure 6C Axon Outgrowth Statistics: n and p-values

| Transfection Condition | Time Point | N-values (total number of neurons measured in 3 culture replicates) | P-values (difference from vector control at same time point) |
|------------------------|------------|---------------------------------------------------------------------|--------------------------------------------------------------|
| Vector                 | DIV3-4     | 26                                                                  | N/A                                                          |
|                        | DIV4-5     | 30                                                                  | N/A                                                          |
|                        | DIV5-6     | 34                                                                  | N/A                                                          |
|                        | DIV6-7     | 33                                                                  | N/A                                                          |
| shLASP1a               | DIV3-4     | 28                                                                  | Not Significant<br>(0.6824)                                  |
|                        | DIV4-5     | 34                                                                  | 0.0025                                                       |
|                        | DIV5-6     | 33                                                                  | 0.0006                                                       |
|                        | DIV6-7     | 26                                                                  | <0.0001                                                      |
| shLASP1b               | DIV3-4     | 25                                                                  | 0.0340                                                       |
|                        | DIV4-5     | 32                                                                  | 0.0002                                                       |
|                        | DIV5-6     | 37                                                                  | 0.0103                                                       |
|                        | DIV6-7     | 36                                                                  | 0.0306                                                       |

**Supplemental Table 2.** Figure 6D Axon Branch Formation Statistics: n and p-values

| Transfection Condition | Time Point | N-values (total number of neurons measured in 3 culture replicates) | P-values (difference from vector control at same time point) |
|------------------------|------------|---------------------------------------------------------------------|--------------------------------------------------------------|
| Vector                 | DIV3-4     | 26                                                                  | N/A                                                          |
|                        | DIV4-5     | 30                                                                  | N/A                                                          |
|                        | DIV5-6     | 34                                                                  | N/A                                                          |
|                        | DIV6-7     | 33                                                                  | N/A                                                          |
| shLASP1a               | DIV3-4     | 28                                                                  | Not Significant<br>(0.9978)                                  |
|                        | DIV4-5     | 34                                                                  | 0.0032                                                       |
|                        | DIV5-6     | 33                                                                  | 0.0004                                                       |
|                        | DIV6-7     | 26                                                                  | 0.0027                                                       |
| shLASP1b               | DIV3-4     | 25                                                                  | 0.0316                                                       |
|                        | DIV4-5     | 32                                                                  | 0.0005                                                       |
|                        | DIV5-6     | 37                                                                  | <0.0001                                                      |
|                        | DIV6-7     | 36                                                                  | 0.0001                                                       |

**Supplemental Table 3.** Figure 7B Growth Cone Dynamics Statistics: n and p-values

| Transfection Condition | N-values (total number of growth cones measured) | Growth Cone Speed P-values (difference from vector control) | Growth Cone Persistence P-value (difference from vector control) |
|------------------------|--------------------------------------------------|-------------------------------------------------------------|------------------------------------------------------------------|
| Vector                 | 36                                               | N/A                                                         | N/A                                                              |
| shLASP1a               | 26                                               | <0.0001                                                     | 0.0188                                                           |
| shLASP1b               | 27                                               | <0.0001                                                     | 0.0027                                                           |

**Supplemental Table 4.** Figure 7C Axon Branch Dynamics Statistics: n and p-values

| Transfection Condition | N-values (total number of neurons measured) | Branch Formation P-values (difference from vector control) | Branch Elimination P-values (difference from vector control) | Branch Lifetime P-values (difference from vector control) |
|------------------------|---------------------------------------------|------------------------------------------------------------|--------------------------------------------------------------|-----------------------------------------------------------|
| Vector                 | 3                                           | N/A                                                        | N/A                                                          | N/A                                                       |
| shLASP1a               | 3                                           | 0.0022                                                     | 0.0184                                                       | 0.6311                                                    |
| shLASP1b               | 3                                           | 0.0017                                                     | 0.0061                                                       | 0.2165                                                    |
